# Supplementary material for: Short-Term Effects of Changing Precipitation Patterns on Shrub-Steppe Grasslands: Seasonal Watering Is More Important than Frequency of Watering Events
Source: PLoS One. 2016 Dec 20;11(12):e0168663. doi: 10.1371/journal.pone.0168663 (PMC5173370; doi:10.1371/journal.pone.0168663)
Supplement: S1 File — (XLSX) [file pone.0168663.s001.xlsx]

## Sheet: Metadata
Grassland site	LG	lower grassland
	MG	middle grassland
	UG	upper grassland
Watering season	c	control
	spring	watered in spring
	fall	watered in fall
Watering frequency	amb	ambient (no rain-out shelters)
	1	frequent (weekly) watering
	4	intensive (monthly) watering
(Ln)	natural logarithm
Functional group	grass	grouped by grasses
	forb	grouped by forbs

## Sheet: Plant community
Grassland site	Watering season	Watering frequency	Total biomass	Total biomass (Ln)	Shannon diversity	Species richness
LG	c	amb	29.671	3.39017	0.0209966	3
LG	c	amb	31.931	3.46358	0.128784	4
LG	c	amb	96.701	4.57162	0.0117131	3
LG	c	amb	19.912	2.99132	0.045424	4
LG	c	amb	36.752	3.60419	0.0643764	5
LG	c	amb	46.995	3.85004	0.305776	6
MG	c	amb	42.892	3.75869	1.05039	9
MG	c	amb	31.602	3.45322	0.771217	7
MG	c	amb	43.933	3.78267	0.47753	9
MG	c	amb	26.44	3.27488	0.585061	4
MG	c	amb	10.542	2.35537	0.613481	5
MG	c	amb	34.843	3.55085	0.327754	8
UG	c	amb	60.262	4.0987	0.905083	9
UG	c	amb	38.375	3.64741	1.00447	10
UG	c	amb	59.953	4.09356	1.09308	7
UG	c	amb	26.262	3.26812	0.966991	8
UG	c	amb	98.034	4.58531	0.868701	9
UG	c	amb	113.123	4.72848	0.590025	9
LG	fall	1	32.493	3.48102	0.0930553	5
LG	fall	4	17.11	2.83966	0.219109	3
LG	fall	1	17.303	2.85088	0.435859	5
LG	fall	4	22.141	3.09743	0.172082	4
LG	fall	1	24.711	3.20725	0.194705	3
LG	fall	4	71.381	4.26803	0.15566	3
LG	fall	1	51.86	3.94855	0.141001	2
LG	fall	4	14.842	2.69746	0.663479	7
LG	fall	1	42.821	3.75703	0.0216068	6
LG	fall	4	17.76	2.87695	0.348442	2
LG	fall	1	13.84	2.62756	0.753721	5
LG	fall	4	13.411	2.59608	0.770275	5
MG	fall	1	34.929	3.55332	0.953136	7
MG	fall	4	16.012	2.77334	0.795863	10
MG	fall	1	13.812	2.62554	1.37857	8
MG	fall	4	42.092	3.73986	0.716821	6
MG	fall	1	27.095	3.29935	1.21743	12
MG	fall	4	35.215	3.56147	0.703446	10
MG	fall	1	24.824	3.21181	1.53931	12
MG	fall	4	27.512	3.31462	0.729904	7
MG	fall	1	25.31	3.2312	0.954016	4
MG	fall	4	23.211	3.14463	0.986326	7
MG	fall	1	17.955	2.88787	0.848279	7
MG	fall	4	29.941	3.39923	1.13396	8
UG	fall	1	38.261	3.64443	0.891199	6
UG	fall	4	45.353	3.81448	0.988204	9
UG	fall	1	71.891	4.27515	1.2309	8
UG	fall	4	91.823	4.51986	0.401867	8
UG	fall	1	66.352	4.19497	1.13062	9
UG	fall	4	62.503	4.13521	0.661227	9
UG	fall	1	92.512	4.52734	1.05725	9
UG	fall	4	39.223	3.66926	0.965556	6
UG	fall	1	65.735	4.18563	0.886198	11
UG	fall	4	72.662	4.28582	1.29381	10
UG	fall	1	69.333	4.23892	1.18598	11
UG	fall	4	46.973	3.84957	1.47111	10
LG	spring	1	10.023	2.30488	0.093036	5
LG	spring	1	48.931	3.89041	0.0110405	3
LG	spring	4	38.021	3.63814	0.0331535	3
LG	spring	1	31.8	3.45947	0.0834808	2
LG	spring	4	33.61	3.51482	0.0605866	2
LG	spring	1	48.081	3.87289	0.262145	5
LG	spring	4	15.86	2.7638	0.165048	2
LG	spring	1	29.911	3.39823	0.0670059	3
LG	spring	4	45.831	3.82496	0.0544355	4
LG	spring	1	36.601	3.60008	0.101313	3
LG	spring	4	19.23	2.95647	0.334969	3
MG	spring	1	25.033	3.22019	0.49858	10
MG	spring	4	55.943	4.02433	0.55634	8
MG	spring	1	27.303	3.307	1.21134	9
MG	spring	4	11.922	2.47839	0.651282	5
MG	spring	1	62.212	4.13055	0.456374	8
MG	spring	4	19.34	2.96218	0.842388	6
MG	spring	1	24.324	3.19146	0.607624	9
MG	spring	4	23.373	3.15158	0.591899	7
MG	spring	1	27.972	3.3312	0.845352	8
MG	spring	4	18.543	2.92009	1.1376	9
MG	spring	1	53.251	3.97502	0.65276	9
MG	spring	4	49.995	3.91192	0.384215	10
UG	spring	1	31.813	3.45988	1.19668	10
UG	spring	4	176.044	5.17073	0.909764	7
UG	spring	1	113.682	4.73341	0.942496	11
UG	spring	4	41.704	3.7306	1.13932	9
UG	spring	1	72.36	4.28165	0.699732	6
UG	spring	4	56.333	4.03128	0.595851	7
UG	spring	1	89.102	4.48978	1.23437	7
UG	spring	4	62.331	4.13246	1.20708	9
UG	spring	1	77.68	4.3526	0.835567	7
UG	spring	4	206.744	5.33148	0.413783	9
UG	spring	1	55.792	4.02163	1.40059	8
UG	spring	4	93.941	4.54267	1.01533	8

## Sheet: Functional group
Functional group	Grassland site	Watering season	Watering frequency	Total biomass	Total biomass (Ln)
grass	LG	c	amb	29.671	3.39017
grass	LG	spring	1	10.021	2.30468
grass	LG	fall	1	32.491	3.48096
grass	LG	fall	4	17.11	2.83966
grass	LG	c	amb	31.151	3.43885
grass	LG	spring	1	48.931	3.89041
grass	LG	spring	4	38.021	3.63814
grass	LG	fall	1	17.301	2.85076
grass	LG	fall	4	22.14	3.09739
grass	LG	c	amb	96.701	4.57162
grass	LG	spring	1	31.8	3.45947
grass	LG	spring	4	33.61	3.51482
grass	LG	fall	1	24.711	3.20725
grass	LG	fall	4	71.381	4.26803
grass	LG	c	amb	19.911	2.99127
grass	LG	spring	1	47.34	3.85736
grass	LG	spring	4	15.86	2.7638
grass	LG	fall	1	51.86	3.94855
grass	LG	fall	4	13.32	2.58927
grass	LG	c	amb	36.74	3.60387
grass	LG	spring	1	29.911	3.39823
grass	LG	spring	4	45.82	3.82472
grass	LG	fall	1	42.78	3.75607
grass	LG	fall	4	17.76	2.87695
grass	LG	c	amb	46.535	3.8402
grass	LG	spring	1	36.6	3.60005
grass	LG	spring	4	18.19	2.90087
grass	LG	fall	1	12.59	2.5329
grass	LG	fall	4	13.29	2.58701
grass	MG	c	amb	35.6	3.57235
grass	MG	spring	1	22.9	3.13114
grass	MG	spring	4	48.87	3.88916
grass	MG	fall	1	27.07	3.29843
grass	MG	fall	4	15.511	2.74155
grass	MG	c	amb	30.12	3.40519
grass	MG	spring	1	21.24	3.05589
grass	MG	spring	4	11.92	2.47822
grass	MG	fall	1	11.33	2.42745
grass	MG	fall	4	35.151	3.55965
grass	MG	c	amb	42.25	3.7436
grass	MG	spring	1	58.1	4.06217
grass	MG	spring	4	15.35	2.73112
grass	MG	fall	1	19.11	2.95021
grass	MG	fall	4	33.181	3.50198
grass	MG	c	amb	26.2	3.26576
grass	MG	spring	1	20.891	3.03932
grass	MG	spring	4	22.891	3.13074
grass	MG	fall	1	8.492	2.13912
grass	MG	fall	4	26.72	3.28541
grass	MG	c	amb	10.211	2.32347
grass	MG	spring	1	22.661	3.12065
grass	MG	spring	4	6.692	1.90091
grass	MG	fall	1	14.99	2.70738
grass	MG	fall	4	19.61	2.97604
grass	MG	c	amb	33.951	3.52492
grass	MG	spring	1	47.77	3.8664
grass	MG	spring	4	48.67	3.88506
grass	MG	fall	1	17.911	2.88542
grass	MG	fall	4	20.49	3.01994
grass	UG	c	amb	57.922	4.0591
grass	UG	spring	1	27.072	3.2985
grass	UG	spring	4	144.793	4.97531
grass	UG	fall	1	28.411	3.34678
grass	UG	fall	4	43.971	3.78353
grass	UG	c	amb	34.102	3.52936
grass	UG	spring	1	103.781	4.64228
grass	UG	spring	4	36.471	3.59652
grass	UG	fall	1	50.71	3.92612
grass	UG	fall	4	90.06	4.50048
grass	UG	c	amb	58.641	4.07143
grass	UG	spring	1	68.16	4.22186
grass	UG	spring	4	48.541	3.88241
grass	UG	fall	1	65.13	4.17639
grass	UG	fall	4	49.221	3.89632
grass	UG	c	amb	23.881	3.17308
grass	UG	spring	1	80.961	4.39397
grass	UG	spring	4	50.48	3.92158
grass	UG	fall	1	85.221	4.44525
grass	UG	fall	4	30.792	3.42725
grass	UG	c	amb	94.702	4.55074
grass	UG	spring	1	76.71	4.34003
grass	UG	spring	4	204.6	5.32106
grass	UG	fall	1	61.552	4.11988
grass	UG	fall	4	58.131	4.0627
grass	UG	c	amb	112.311	4.72127
grass	UG	spring	1	55.79	4.02159
grass	UG	spring	4	92.78	4.53023
grass	UG	fall	1	63.691	4.15404
grass	UG	fall	4	46.111	3.83105
forb	LG	c	amb	0	0
forb	LG	spring	1	0.002	-6.21461
forb	LG	fall	1	0.002	-6.21461
forb	LG	fall	4	0	0
forb	LG	c	amb	0.78	-0.248461
forb	LG	spring	1	0	0
forb	LG	spring	4	0	0
forb	LG	fall	1	0.002	-6.21461
forb	LG	fall	4	0.001	-6.90776
forb	LG	c	amb	0	0
forb	LG	spring	1	0	0
forb	LG	spring	4	0	0
forb	LG	fall	1	0	0
forb	LG	fall	4	0	0
forb	LG	c	amb	0.001	-6.90776
forb	LG	spring	1	0.741	-0.299755
forb	LG	spring	4	0	0
forb	LG	fall	1	0	0
forb	LG	fall	4	1.522	0.420025
forb	LG	c	amb	0.012	-4.42285
forb	LG	spring	1	0	0
forb	LG	spring	4	0.011	-4.50986
forb	LG	fall	1	0.041	-3.19418
forb	LG	fall	4	0	0
forb	LG	c	amb	0.46	-0.776529
forb	LG	spring	1	0.001	-6.90776
forb	LG	spring	4	1.04	0.0392207
forb	LG	fall	1	1.25	0.223144
forb	LG	fall	4	0.121	-2.11196
forb	MG	c	amb	7.292	1.98678
forb	MG	spring	1	2.133	0.757529
forb	MG	spring	4	7.073	1.95628
forb	MG	fall	1	7.859	2.06166
forb	MG	fall	4	0.501	-0.691149
forb	MG	c	amb	1.482	0.393393
forb	MG	spring	1	6.063	1.8022
forb	MG	spring	4	0.002	-6.21461
forb	MG	fall	1	2.482	0.909065
forb	MG	fall	4	6.941	1.93745
forb	MG	c	amb	1.683	0.520578
forb	MG	spring	1	4.112	1.41391
forb	MG	spring	4	3.99	1.38379
forb	MG	fall	1	7.985	2.07756
forb	MG	fall	4	2.034	0.710004
forb	MG	c	amb	0.24	-1.42712
forb	MG	spring	1	3.433	1.23343
forb	MG	spring	4	0.482	-0.729811
forb	MG	fall	1	16.332	2.79313
forb	MG	fall	4	0.792	-0.233194
forb	MG	c	amb	0.331	-1.10564
forb	MG	spring	1	5.311	1.66978
forb	MG	spring	4	11.851	2.47241
forb	MG	fall	1	10.32	2.33408
forb	MG	fall	4	3.601	1.28121
forb	MG	c	amb	0.892	-0.114289
forb	MG	spring	1	5.481	1.70129
forb	MG	spring	4	1.325	0.281412
forb	MG	fall	1	0.044	-3.12357
forb	MG	fall	4	9.451	2.24612
forb	UG	c	amb	2.34	0.850151
forb	UG	spring	1	4.741	1.55625
forb	UG	spring	4	31.251	3.44205
forb	UG	fall	1	9.85	2.28747
forb	UG	fall	4	1.382	0.323532
forb	UG	c	amb	4.273	1.45232
forb	UG	spring	1	9.901	2.29264
forb	UG	spring	4	5.233	1.65498
forb	UG	fall	1	21.181	3.0531
forb	UG	fall	4	1.763	0.567017
forb	UG	c	amb	1.312	0.271553
forb	UG	spring	1	4.2	1.43508
forb	UG	spring	4	7.792	2.0531
forb	UG	fall	1	1.222	0.200489
forb	UG	fall	4	13.282	2.58641
forb	UG	c	amb	2.381	0.867521
forb	UG	spring	1	8.141	2.09691
forb	UG	spring	4	11.851	2.47241
forb	UG	fall	1	7.291	1.98664
forb	UG	fall	4	8.431	2.13192
forb	UG	c	amb	3.332	1.20357
forb	UG	spring	1	0.97	-0.0304592
forb	UG	spring	4	2.144	0.762673
forb	UG	fall	1	4.183	1.43103
forb	UG	fall	4	14.531	2.67628
forb	UG	c	amb	0.812	-0.208255
forb	UG	spring	1	0.002	-6.21461
forb	UG	spring	4	1.161	0.149282
forb	UG	fall	1	5.642	1.73024
forb	UG	fall	4	0.862	-0.1485

## Sheet: PRS probes N
Grassland site	Watering season	Watering frequency	Total nitrogen
SPRING
LG	c	amb	4.54
LG	spring	1	4.5
LG	spring	4	3.66
LG	fall	1	11.16
LG	fall	4	7.46
LG	c	amb	3.68
LG	spring	1	3.24
LG	spring	4	12.72
LG	fall	1	6.66
LG	fall	4	9.92
MG	c	amb	6.4
MG	spring	1	2.34
MG	spring	4	5.26
MG	fall	1	10.68
MG	fall	4	1.64
MG	c	amb	3.52
MG	spring	1	4.9
MG	spring	4	0
MG	fall	1	8.6
MG	fall	4	0.48
UG	c	amb	6.62
UG	spring	1	5.44
UG	spring	4	2.58
UG	fall	1	2.08
UG	fall	4	4.22
UG	c	amb	4.62
UG	spring	1	1.62
UG	spring	4	5.38
UG	fall	1	2.26
UG	fall	4	0.72
SUMMER
LG	c	amb	4.32
LG	spring	1	5.44
LG	spring	4	2.24
LG	fall	1	14.26
LG	fall	4	8.86
LG	c	amb	5.5
LG	spring	1	7.92
LG	spring	4	6.08
LG	fall	1	17.26
LG	fall	4	14.7
MG	c	amb	5.62
MG	spring	1	7.36
MG	spring	4	21.64
MG	fall	1	22.68
MG	fall	4	13.46
MG	c	amb	14.66
MG	spring	1	9.86
MG	spring	4	9.76
MG	fall	1	7.62
MG	fall	4	18.36
UG	c	amb	7.92
UG	spring	1	7.24
UG	spring	4	19.12
UG	fall	1	13.18
UG	fall	4	9.74
UG	c	amb	8.92
UG	spring	1	9.44
UG	spring	4	9.28
UG	fall	1	12.62
UG	fall	4	7.02
FALL
LG	c	amb	12.2
LG	spring	1	12.04
LG	spring	4	16.72
LG	fall	1	17.16
LG	fall	4	17.76
LG	c	amb	2.72
LG	spring	1	11.22
LG	spring	4	7.28
LG	fall	1	11.8
LG	fall	4	13.54
MG	c	amb	32.02
MG	spring	1	13
MG	spring	4	17.98
MG	fall	1	18.4
MG	fall	4	26.34
MG	c	amb	29.3
MG	spring	1	22.58
MG	spring	4	7.56
MG	fall	1	16.78
MG	fall	4	28.02
UG	c	amb	12.98
UG	spring	1	7.8
UG	spring	4	17.7
UG	fall	1	18.66
UG	fall	4	15.66
UG	c	amb	12.8
UG	spring	1	8.84
UG	spring	4	10.14
UG	fall	1	10.22
UG	fall	4	14.84

## Sheet: Soil extractable N
Grassland site	Watering season	Watering frequency	Total nitrogen
LG	c	amb	2.41476
LG	spring	1	1.74417
LG	spring	4	1.94949
LG	fall	1	2.69752
LG	fall	4	2.51988
LG	c	amb	1.36728
LG	spring	1	1.98232
LG	spring	4	2.0954
LG	fall	1	2.34675
LG	fall	4	3.24273
MG	c	amb	2.29692
MG	spring	1	3.6919
MG	spring	4	2.90895
MG	fall	1	2.8744
MG	fall	4	4.21986
MG	c	amb	2.00245
MG	spring	1	2.23251
MG	spring	4	2.20024
MG	fall	1	1.92698
MG	fall	4	2.33289
UG	c	amb	7.48522
UG	spring	1	3.55508
UG	spring	4	6.69835
UG	fall	1	5.27758
UG	fall	4	4.58396
UG	c	amb	3.65141
UG	spring	1	4.529
UG	spring	4	9.68477
UG	fall	1	7.94409
UG	fall	4	8.92996
